# Supplementary material for: Genome analysis of the ubiquitous boxwood pathogen Pseudonectria foliicola
Source: PeerJ. 2018 Aug 24;6:e5401. doi: 10.7717/peerj.5401 (PMC6110257; doi:10.7717/peerj.5401)
Supplement: Table S1 [file peerj-06-5401-s004.xlsx]

## Sheet: Supplementary Table 1
Supplementary Table 1. Molecular functions, biological processess, and cellular components annotated by the Gene Ontology (GO) database using OrthoVenn (http://www.bioinfogenome.net/OrthoVenn/, on November 22, 2017)
Slimmed_GO	Molecular function	Count of unique input accessions
		F. graminearum	D. macrodidyma	P. foliicola
GO:0000166	nucleotide binding	4	25
GO:0001882	nucleoside binding		16
GO:0003674	molecular_function		1
GO:0003676	nucleic acid binding	2	5
GO:0003682	chromatin binding		1
GO:0004386	helicase activity		2
GO:0004497	monooxygenase activity	1	9
GO:0004871	signal transducer activity		2
GO:0005198	structural molecule activity	3		2
GO:0005215	transporter activity	3	14
GO:0005488	binding	2	18
GO:0005515	protein binding	1
GO:0008233	peptidase activity		2
GO:0008289	lipid binding		1
GO:0016491	oxidoreductase activity	5	38	1
GO:0016740	transferase activity	4	15
GO:0016787	hydrolase activity	1	16
GO:0016829	lyase activity	3	6
GO:0016853	isomerase activity		1
GO:0016874	ligase activity		9
GO:0030234	enzyme regulator activity		1
GO:0030246	carbohydrate binding		1
GO:0043167	ion binding	7	47
GO:0045735	nutrient reservoir activity		1
GO:0046906	tetrapyrrole binding	1	7
GO:0048037	cofactor binding	4	11
GO:0051213	dioxygenase activity		3
GO:0051540	metal cluster binding		1
Slimmed_GO	Biological process	Count of unique input accessions
		F. graminearum	D. macrodidyma	P. foliicola
GO:0000003	reproduction		1
GO:0005975	carbohydrate metabolic process		12
GO:0006066	alcohol metabolic process		5
GO:0006081	cellular aldehyde metabolic process		2
GO:0006082	organic acid metabolic process	4	18
GO:0006091	generation of precursor metabolites and energy		3
GO:0006139	nucleobase-containing compound metabolic process		5
GO:0006396	RNA processing		1
GO:0006412	translation	1
GO:0006464	cellular protein modification process	1	7
GO:0006508	proteolysis		1
GO:0006629	lipid metabolic process	3	8
GO:0006725	cellular aromatic compound metabolic process	1	17
GO:0006793	phosphorus metabolic process		4
GO:0006807	nitrogen compound metabolic process	2	20
GO:0006810	transport	1	2
GO:0006811	ion transport	1	2
GO:0006818	hydrogen transport		1
GO:0006869	lipid transport		1
GO:0006996	organelle organization		1
GO:0007030	Golgi organization	1
GO:0007049	cell cycle		1
GO:0007154	cell communication		6
GO:0008150	biological_process	6	45	1
GO:0008152	metabolic process	7	42
GO:0008283	cell proliferation		1
GO:0008643	carbohydrate transport	1	7
GO:0009116	nucleoside metabolic process		2
GO:0009117	nucleotide metabolic process		2
GO:0009308	amine metabolic process		3
GO:0009404	toxin metabolic process		1
GO:0009914	hormone transport		1
GO:0009987	cellular process	2	22	1
GO:0010118	stomatal movement	1
GO:0015031	protein transport		1
GO:0015791	polyol transport		1
GO:0015931	nucleobase-containing compound transport		2
GO:0015979	photosynthesis		1
GO:0016043	cellular component organization		3
GO:0016049	cell growth	1
GO:0016070	RNA metabolic process		5
GO:0016458	gene silencing		1
GO:0019538	protein metabolic process		2
GO:0019748	secondary metabolic process	1	4
GO:0022607	cellular component assembly	1
GO:0032501	multicellular organismal process	1	10
GO:0032502	developmental process	1	11
GO:0040007	growth	1
GO:0042180	cellular ketone metabolic process	1	1
GO:0042440	pigment metabolic process	2	3
GO:0042445	hormone metabolic process		4
GO:0042886	amide transport		1
GO:0043170	macromolecule metabolic process		8
GO:0043412	macromolecule modification		2
GO:0043446	cellular alkane metabolic process		1
GO:0044237	cellular metabolic process	4	29
GO:0044238	primary metabolic process	2	13
GO:0044255	cellular lipid metabolic process	3	7
GO:0044419	interspecies interaction between organisms	1
GO:0045333	cellular respiration		1
GO:0046483	heterocycle metabolic process		13
GO:0048469	cell maturation	1
GO:0048511	rhythmic process		1
GO:0050896	response to stimulus	3	19
GO:0051179	localization	1	3
GO:0051186	cofactor metabolic process		5
GO:0051234	establishment of localization		2
GO:0051276	chromosome organization		4
GO:0051301	cell division		1
GO:0051606	detection of stimulus		1
GO:0051641	cellular localization		1
GO:0051704	multi-organism process		2
GO:0065007	biological regulation	1	11	1
GO:0071555	cell wall organization	3	2	1
Slimmed_GO	Cellular component	Count of unique input accessions
		F. graminearum	D. macrodidyma	P. foliicola
GO:0000151	ubiquitin ligase complex		1
GO:0000347	THO complex		1
GO:0005575	cellular_component	6	33
GO:0005576	extracellular region	3	14	1
GO:0005618	cell wall	3	5	1
GO:0005622	intracellular	1	16
GO:0005634	nucleus	1	7
GO:0005730	nucleolus		1
GO:0005739	mitochondrion		7
GO:0005768	endosome	1
GO:0005773	vacuole		4
GO:0005783	endoplasmic reticulum		7
GO:0005794	Golgi apparatus	1	1
GO:0005840	ribosome	1
GO:0005856	cytoskeleton		1
GO:0009536	plastid	6	15	1
GO:0009579	thylakoid	1	1
GO:0016020	membrane	6	28
GO:0031012	extracellular matrix		3
GO:0042579	microbody		4
GO:0042597	periplasmic space		1
GO:0042995	cell projection		1
GO:0043226	organelle		7
GO:0043229	intracellular organelle		7
GO:0043232	intracellular non-membrane-bounded organelle		1
GO:0044464	cell part	2	22
GO:0045178	basal part of cell		1
GO:0045254	pyruvate dehydrogenase complex		1
GO:0055044	symplast	1	2	1
