# Supplementary material for: Genome analysis of the ubiquitous boxwood pathogen Pseudonectria foliicola
Source: PeerJ. 2018 Aug 24;6:e5401. doi: 10.7717/peerj.5401 (PMC6110257; doi:10.7717/peerj.5401)
Supplement: Table S2 — CBM, carbohydrate binding module; CE, carbohydrate esterase; GH, glycoside hydrolases; GT, glycosyltransferase; PL, polysaccharide lyase. [file peerj-06-5401-s005.xlsx]

## Sheet: Sheet1
Supplementary Table 2. Comparative analysis of fungal CAZymes (from Zhao et al. 20131 and this study). CBM, carbohydrate binding module; CE, carbohydrate esterase; GH, glycoside hydrolases; GT, glycosyltransferase; PL, polysaccharide lyase.
This Study		Species	CBM Totals	CE Totals	GH Totals	GT Totals	PL Totals	Total CAZymes
		Pseudonectria buxi	46	64	179	88	18	395
		Fusarium graminearum	80	127	268	100	22	597
		Dactylonectria macrodidyma	116	210	447	125	41	939
	Plant Associated Fungi (Pathogens and symbiotic)
Zhao et al. 2013			CBM Totals	CE Totals	GH Totals	GT Totals	PL Totals	Total CAZymes
	Symbiotic Fungi	Tuber melanosporum	29	38	91	64	3	225
		Paxillus rubicundulus	27	66	123	74	8	298
		Cladonia grayi	21	71	110	102	1	305
		Laccaria amethystina	41	57	153	87	10	348
		Laccaria bicolor	33	63	172	77	8	353
		Paxillus involutus	39	87	154	76	8	364
		Hebeloma cylindrosporum	43	89	173	93	7	405
	Biotrophic	Blumeria graminis	14	30	67	59	0	170
		Melampsora laricis-populina	15	61	108	54	6	244
		Ustilago maydis	11	64	117	69	3	264
		Puccinia triticina	15	62	137	75	3	292
		Puccinia graminis	15	64	155	91	6	331
		Cladosporium fulvum	46	128	283	109	11	577
	Hemibiotrophic	Moniliophthora perniciosa	31	58	163	36	14	302
		Mycosphaerella graminicola	21	95	188	106	4	414
		Dothistroma septosporum	32	108	208	117	6	471
		Fusarium graminearum	83	144	279	109	21	636
		Cochliobolus sativus	97	141	288	104	16	646
		Magnaporthe oryzae	121	136	287	103	5	652
		Glomerella graminicola	95	138	322	106	15	676
	Necrotrophic	Heterobasidion annosum	51	90	197	71	10	419
		Fomitiporia mediterranea	41	95	230	82	8	456
		Dichomitus squalens	63	107	249	82	13	514
		Sclerotinia sclerotiorum	86	99	234	93	5	517
		Magnaporthe poae	93	92	257	80	6	528
		Botryotinia fuckeliana	69	119	256	104	11	559
		Pyrenophora tritici	57	125	265	105	10	562
		Pyrenophora teres	68	127	268	104	11	578
		Phaeosphaeria nodorum	66	144	291	96	10	607
		Verticillium albo-atrum	78	105	298	92	38	611
		Gaeumannomyces graminis	104	115	295	94	6	614
		Verticillium dahliae	88	123	302	101	37	651
		Fusarium verticillioides	92	183	332	109	26	742
		Nectria haematococca	99	223	382	121	36	861
		Fusarium oxysporum	119	197	396	128	25	865
	Facultative Pathogenic Fungi
			CBM Totals	CE Totals	GH Totals	GT Totals	PL Totals	Total CAZymes
	Group 1	Aspergillus niger	44	120	192	85	10	451
		Schizophyllum commune	43	104	275	89	17	528
		Penicillium marneffei	84	107	242	105	4	542
		Aspergillus fumigatus	68	108	284	109	15	584
		Aspergillus nidulans	77	119	284	98	21	599
		Arthrobotrys oligospora	176	91	236	89	15	607
		Chaetomium globosum	109	104	284	95	16	608
		Aspergillus terreus	81	133	303	106	16	639
		Neosartorya fischeri	95	128	318	104	17	662
		Aspergillus flavus	54	151	334	121	25	685
	Group 2	Malassezia globosa	1	24	30	42	1	98
		Lodderomyces elongisporus	10	23	46	70	1	150
		Candida lusitaniae	10	23	58	63	0	154
		Candida parapsilosis	12	27	58	69	1	167
		Candida albicans	11	30	59	73	0	173
		Candida tropicalis	10	27	60	80	0	177
		Candida guilliermondii	11	27	70	72	0	180
		Paracoccidioides brasiliensis	8	41	85	62	0	196
		Ajellomyces capsulatus	11	36	89	64	1	201
		Coccidioides posadasii str. Silveira	15	50	69	68	1	203
		Coccidioides immitis	18	52	73	74	1	218
		Cryptococcus gattii	14	28	102	71	5	220
		Ajellomyces dermatitidis	16	47	93	74	0	230
		Trichophyton tonsurans	25	51	84	74	0	234
		Trichophyton equinum	24	52	85	75	0	236
		Cryptococcus neoformans	14	36	111	74	5	240
		Trichophyton verrucosum	25	52	86	77	0	240
		Arthroderma benhamiae	27	51	88	81	0	247
		Trichophyton rubrum	34	57	86	75	0	252
		Batrachochytrium dendrobatidis	97	53	49	75	5	279
		Arthroderma gypseum	65	59	92	78	0	294
		Arthroderma otae	70	58	91	77	0	296
	Saprophytic Fungi
			CBM Totals	CE Totals	GH Totals	GT Totals	PL Totals	Total CAZymes
	Group 1	Rhodotorula glutinis	9	27	18	47	3	104
		Schizosaccharomyces octosporus	7	15	49	60	0	131
		Schizosaccharomyces japonicus	10	15	50	58	0	133
		Schizosaccharomyces cryophilus	5	17	51	62	0	135
		Schizosaccharomyces pombe	9	17	56	62	0	144
		Saccharomyces cerevisiae S288c	10	18	57	68	0	153
		Debaryomyces hansenii	12	27	67	73	0	179
		Uncinocarpus reesii	28	41	82	74	0	225
	Group 2	Spizellomyces punctatus	30	76	70	88	5	269
		Postia placenta	33	82	153	34	1	303
		Phycomyces blakesleeanus	52	77	84	118	6	337
		Chaetomium thermophilum var. thermophilum	48	64	148	73	5	338
		Gloeophyllum trabeum	31	69	176	65	9	350
		Mucor circinelloides	32	96	97	151	5	381
		Serpula lacrymans	50	82	182	70	7	391
		Allomyces macrogynus	43	102	99	150	4	398
		Neurospora tetrasperma	58	70	196	91	4	419
		Rhizopus oryzae	52	88	130	157	7	434
		Neurospora crassa	65	69	206	91	4	435
		Trichoderma reesei	50	75	219	92	5	441
		Fomitopsis pinicola	49	104	215	85	4	457
		Jaapia argillacea	59	96	223	83	7	468
		Aspergillus clavatus	58	102	214	96	7	477
		Botryobasidium botryosum	74	97	224	73	14	482
		Penicillium chrysogenum	57	103	242	109	10	521
		Coniophora puteana	43	137	270	81	5	536
		Hypholoma sublateritium	80	130	245	87	13	555
		Talaromyces stipitatus	68	106	276	109	2	561
		Ganoderma sp. 10597	70	108	294	83	11	566
		Coprinopsis cinerea	122	115	244	89	18	588
		Aspergillus oryzae	47	134	317	111	27	636
		Gymnopus luxurians	118	176	346	103	17	760
	1Zhao Z, Liu H, Wang C, Xu J-R, 2013. Comparative analysis of fungal genome reveals different plant cell wall degrading capacity in fungi. BMC Genomics 14, 274.
