# Supplementary material for: Genome analysis of the ubiquitous boxwood pathogen Pseudonectria foliicola
Source: PeerJ. 2018 Aug 24;6:e5401. doi: 10.7717/peerj.5401 (PMC6110257; doi:10.7717/peerj.5401)
Supplement: Table S4 [file peerj-06-5401-s007.xlsx]

## Sheet: Table S3
Supplementary Table 4. Calibration points matching the taxa used in the phylogenetic tree obtained from treetime.org
All the calibration points were used to time the main timetree (Figure 2).
Node	Estimates - CI (Mya)
1	590 (460-726)
2	394 (273-481)
3	437 (284-590)
4	394 (194-179)
5	364 (314-414)
6	246 (193-294)
7	246 (179-294)
